# Supplementary material for: Module-based regularization improves Gaussian graphical models when observing noisy data
Source: Springer Nature journal article supplement (doi:10.1007/s41109-024-00612-8), 2024-03-18
Supplement: MOESM1 [file 26874366]

## Sample list

| BioProject  | Run         |
|-------------|-------------|
| PRJEB19974  | ERR1886180  |
| PRJEB19974  | ERR1886181  |
| PRJEB19974  | ERR1886182  |
| PRJEB19974  | ERR1886183  |
| PRJEB19974  | ERR1886184  |
| PRJEB19974  | ERR1886185  |
| PRJEB19974  | ERR1886186  |
| PRJEB19974  | ERR1886187  |
| PRJEB19974  | ERR1886188  |
| PRJEB19974  | ERR1886189  |
| PRJEB19974  | ERR1886190  |
| PRJEB19974  | ERR1886191  |
| PRJEB19974  | ERR1886192  |
| PRJEB19974  | ERR1886193  |
| PRJEB19974  | ERR1886194  |
| PRJEB19974  | ERR1886195  |
| PRJEB19974  | ERR1886196  |
| PRJEB19974  | ERR1886197  |
| PRJEB19974  | ERR1886198  |
| PRJEB19974  | ERR1886199  |
| PRJEB19974  | ERR1886200  |
| PRJEB19974  | ERR1886201  |
| PRJEB19974  | ERR1886202  |
| PRJEB19974  | ERR1886203  |
| PRJEB19974  | ERR1886204  |
| PRJEB19974  | ERR1886205  |
| PRJEB19974  | ERR1886206  |
| PRJEB19974  | ERR1886207  |
| PRJEB19974  | ERR1886208  |
| PRJEB19974  | ERR1886209  |
| PRJEB19974  | ERR1886210  |
| PRJEB19974  | ERR1886211  |
| PRJEB19974  | ERR1886212  |
| PRJEB19974  | ERR1886213  |
| PRJEB19974  | ERR1886214  |
| PRJEB19974  | ERR1886215  |
| PRJEB19974  | ERR1886216  |
| PRJEB19974  | ERR1886217  |
| PRJEB19974  | ERR1886218  |
| PRJEB19974  | ERR1886219  |
| PRJEB19974  | ERR1886220  |
| PRJEB19974  | ERR1886221  |
| PRJEB19974  | ERR1886222  |
| PRJEB19974  | ERR1886223  |
| PRJEB19974  | ERR1886224  |
| PRJEB19974  | ERR1886225  |
| PRJEB19974  | ERR1886226  |
| PRJEB19974  | ERR1886227  |
| PRJEB19974  | ERR1886228  |
| PRJEB19974  | ERR1886229  |
| PRJEB19974  | ERR1886230  |
| PRJEB19974  | ERR1886231  |
| PRJEB19974  | ERR1886232  |
| PRJEB19974  | ERR1886233  |
| PRJEB19974  | ERR1886234  |
| PRJEB19974  | ERR1886235  |
| PRJEB19974  | ERR1886236  |
| PRJEB19974  | ERR1886237  |
| PRJEB19974  | ERR1886238  |
| PRJEB19974  | ERR1886239  |
| PRJEB19974  | ERR1886240  |
| PRJEB19974  | ERR1886241  |
| PRJEB19974  | ERR1886242  |
| PRJEB19974  | ERR1886243  |
| PRJEB19974  | ERR1886244  |
| PRJEB19974  | ERR1886245  |
| PRJEB19974  | ERR1886246  |
| PRJEB19974  | ERR1886247  |
| PRJEB19974  | ERR1886248  |
| PRJEB19974  | ERR1886249  |
| PRJEB19974  | ERR1886252  |
| PRJEB19974  | ERR1886255  |
| PRJEB33339  | ERR3414595  |
| PRJEB33339  | ERR3414597  |
| PRJEB33339  | ERR3414599  |
| PRJEB33339  | ERR3414601  |
| PRJEB33339  | ERR3414673  |
| PRJEB33339  | ERR3414675  |
| PRJEB33339  | ERR3414677  |
| PRJEB33339  | ERR3414679  |
| PRJEB33339  | ERR3414713  |
| PRJEB33339  | ERR3414715  |
| PRJEB33339  | ERR3414717  |
| PRJEB33339  | ERR3414719  |
| PRJEB33339  | ERR3414753  |
| PRJEB33339  | ERR3414755  |
| PRJEB33339  | ERR3414757  |
| PRJEB33339  | ERR3414759  |
| PRJNA593027 | SRR10574515 |
| PRJNA593027 | SRR10574516 |
| PRJNA593027 | SRR10574517 |
| PRJNA593027 | SRR10574518 |
| PRJNA593027 | SRR10574519 |
| PRJNA593027 | SRR10574520 |
| PRJNA593027 | SRR10574521 |
| PRJNA593027 | SRR10574522 |
| PRJNA593027 | SRR10574523 |
| PRJNA267681 | SRR1655104  |
| PRJNA267681 | SRR1655105  |
| PRJNA267681 | SRR1655106  |
| PRJNA267681 | SRR1655110  |
| PRJNA267681 | SRR1655111  |
| PRJNA267681 | SRR1655112  |
| PRJNA267681 | SRR1655116  |
| PRJNA267681 | SRR1655117  |
| PRJNA267681 | SRR1655118  |
| PRJNA324514 | SRR3724649  |
| PRJNA324514 | SRR3724650  |
| PRJNA324514 | SRR3724651  |
| PRJNA324514 | SRR3724652  |
| PRJNA324514 | SRR3724663  |
| PRJNA324514 | SRR3724668  |
| PRJNA324514 | SRR3724737  |
| PRJNA324514 | SRR3724738  |
| PRJNA324514 | SRR3724739  |
| PRJNA324514 | SRR3724741  |
| PRJNA401073 | SRR6057443  |
| PRJNA401073 | SRR6057444  |
| PRJNA401073 | SRR6057445  |
| PRJNA401073 | SRR6057446  |
| PRJNA401073 | SRR6057447  |
| PRJNA401073 | SRR6057449  |
| PRJNA445300 | SRR6880723  |
| PRJNA445300 | SRR6880725  |
| PRJNA445300 | SRR6880727  |
| PRJNA445300 | SRR6880729  |
| PRJNA445300 | SRR6880731  |
| PRJNA445300 | SRR6880733  |
| PRJNA445300 | SRR6880735  |
| PRJNA445300 | SRR6880737  |
| PRJNA445300 | SRR6880739  |
| PRJNA445300 | SRR6880741  |
| PRJNA445300 | SRR6880743  |
| PRJNA445300 | SRR6880745  |
| PRJNA445300 | SRR6880747  |
| PRJNA445300 | SRR6880749  |
| PRJNA445300 | SRR6880751  |
| PRJNA445300 | SRR6880753  |
| PRJNA445300 | SRR6880755  |
| PRJNA445300 | SRR6880757  |
| PRJNA476778 | SRR7367104  |
| PRJNA476778 | SRR7367105  |
| PRJNA476778 | SRR7367106  |
| PRJNA476778 | SRR7367111  |
| PRJNA476778 | SRR7367112  |
| PRJNA476778 | SRR7367113  |
| PRJNA476778 | SRR7367114  |
| PRJNA476778 | SRR7367127  |
| PRJNA476778 | SRR7367129  |
| PRJNA476778 | SRR7367135  |
| PRJNA513852 | SRR8422200  |
| PRJNA513852 | SRR8422201  |
| PRJNA513852 | SRR8422202  |
| PRJNA513852 | SRR8422203  |
| PRJNA513852 | SRR8422204  |
| PRJNA513852 | SRR8422205  |
| PRJNA411947 | SRR8570475  |
| PRJNA411947 | SRR8570476  |
| PRJNA411947 | SRR8570477  |
| PRJNA411947 | SRR8570478  |
| PRJNA411947 | SRR8570479  |
| PRJNA411947 | SRR8570480  |
| PRJNA411947 | SRR8570481  |
| PRJNA411947 | SRR8570482  |
| PRJNA411947 | SRR8570483  |
| PRJNA411947 | SRR8570484  |
| PRJNA411947 | SRR8570485  |
| PRJNA411947 | SRR8570486  |
| PRJNA411947 | SRR8570487  |
| PRJNA411947 | SRR8570488  |
| PRJNA411947 | SRR8570489  |
| PRJNA411947 | SRR8570490  |
| PRJNA411947 | SRR8570491  |
| PRJNA411947 | SRR8570492  |
| PRJNA411947 | SRR8570493  |
| PRJNA411947 | SRR8570494  |
| PRJNA411947 | SRR8570495  |
| PRJNA411947 | SRR8570496  |
| PRJNA411947 | SRR8570497  |
| PRJNA411947 | SRR8570498  |
| PRJNA411947 | SRR8570499  |
| PRJNA411947 | SRR8570500  |
| PRJNA411947 | SRR8570501  |
| PRJNA411947 | SRR8570502  |
| PRJNA411947 | SRR8570503  |
| PRJNA411947 | SRR8570504  |
| PRJNA411947 | SRR8570505  |
| PRJNA411947 | SRR8570506  |
| PRJNA411947 | SRR8570507  |
| PRJNA411947 | SRR8570508  |
| PRJNA411947 | SRR8570509  |
| PRJNA411947 | SRR8570510  |
| PRJNA525452 | SRR8667484  |
| PRJNA525452 | SRR8667485  |
| PRJNA525452 | SRR8667486  |
| PRJNA525452 | SRR8667487  |
| PRJNA525452 | SRR8667488  |
| PRJNA525452 | SRR8667489  |
| PRJNA525452 | SRR8667490  |
| PRJNA525452 | SRR8667492  |
| PRJNA525452 | SRR8667493  |
| PRJNA218632 | SRR976391   |
| PRJNA218632 | SRR976397   |
